# Supplementary material
Source: PubMed Central journal article supplement (PMC2268773)

Seed #

1 2 3 4 5

1F

1G

3C

3F

27F

C

27G

A

Seed #

1 2 3 4 5

B

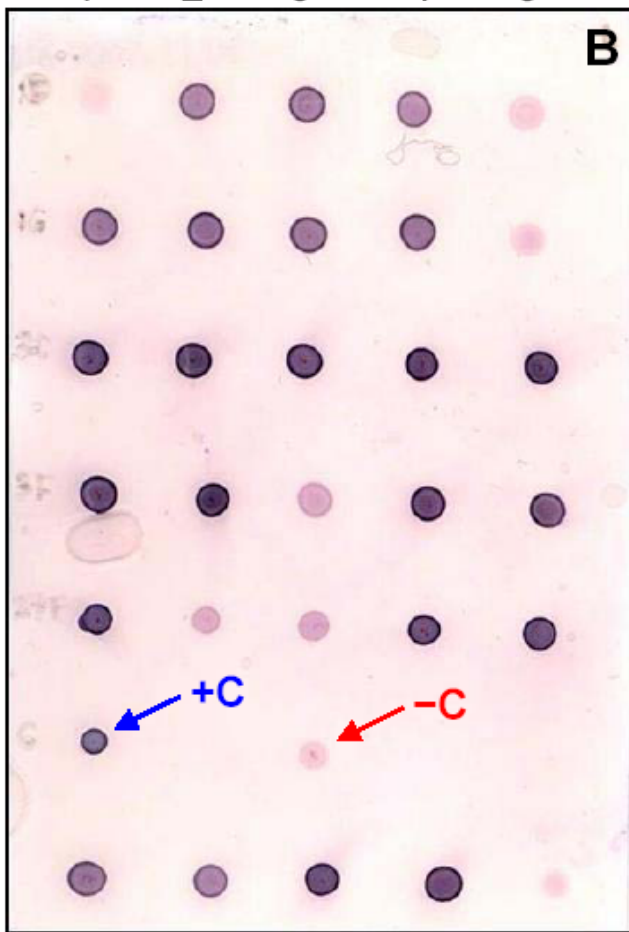

Supplement: pnas_0708841104_1.pdf [file pnas_0708841104_1.pdf]

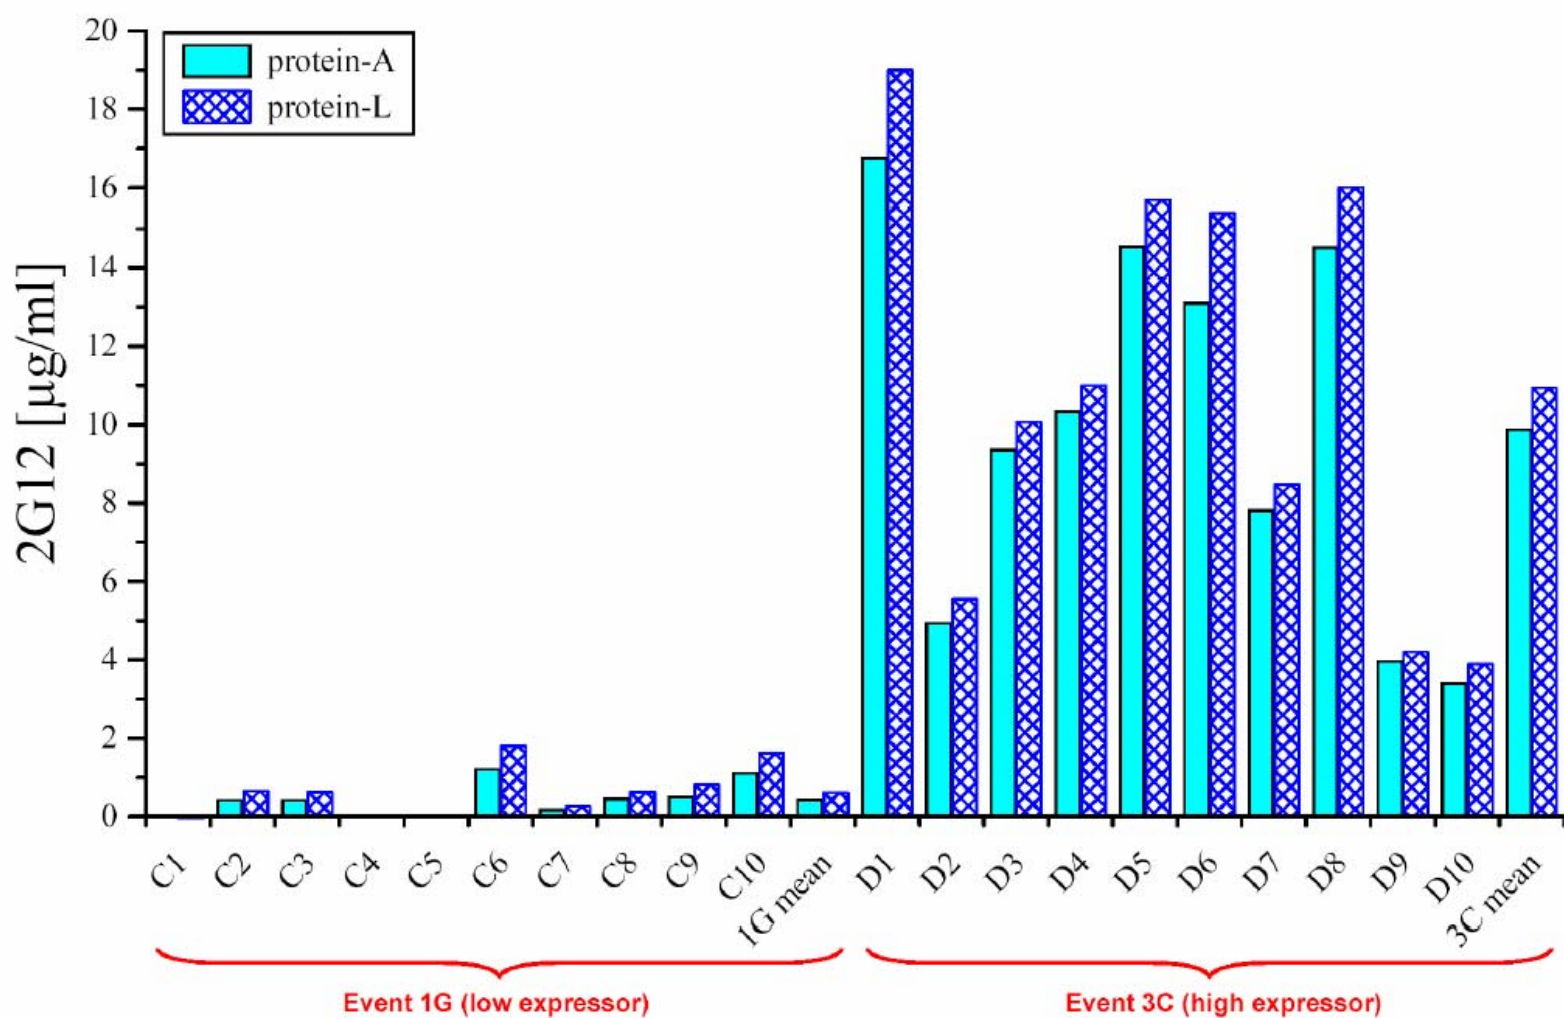

Supplement: pnas_0708841104_3.pdf [file pnas_0708841104_3.pdf]
